# Supplementary material for: Macroscopic ordering of helical pores for arraying guest molecules noncentrosymmetrically
Source: PubMed Central journal article supplement (PMC4598726; doi:10.1038/ncomms9418), 2015-09-29
Supplement: ncomms9418-s1.pdf [file ncomms9418-s1.pdf]

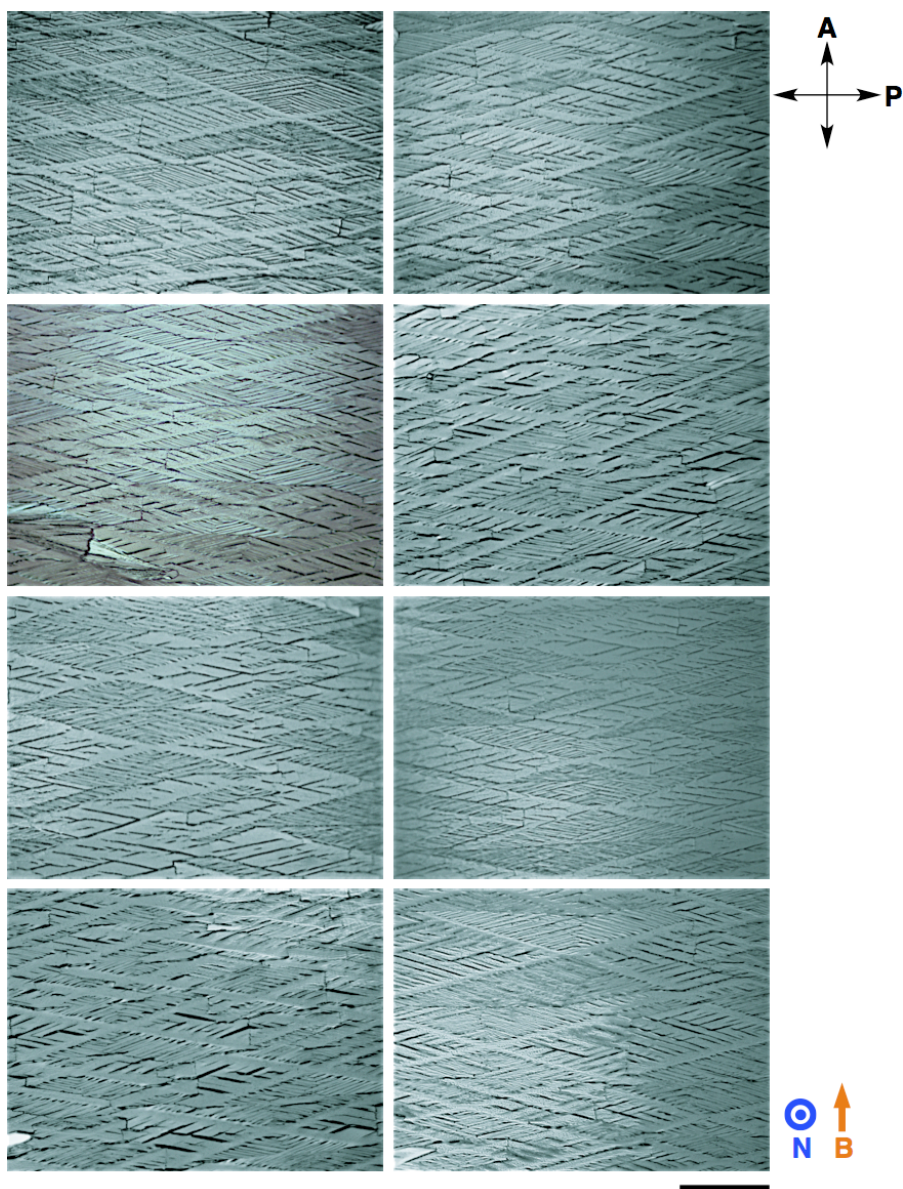

**Supplementary Fig. 1** | POM images (under crossed Nicols) of a film of the liquid crystalline salt **F·T** with a magnetically oriented structure ( $\sim 10 \mu\text{m}$  thick) at arbitrarily selected viewing fields. **B**: Magnetic field applied during the LC film-preparation process. Scale bar:  $500 \mu\text{m}$ . **N**: Normal vector of the film surface. **P**: Polarizer direction. **A**: Analyzer direction.

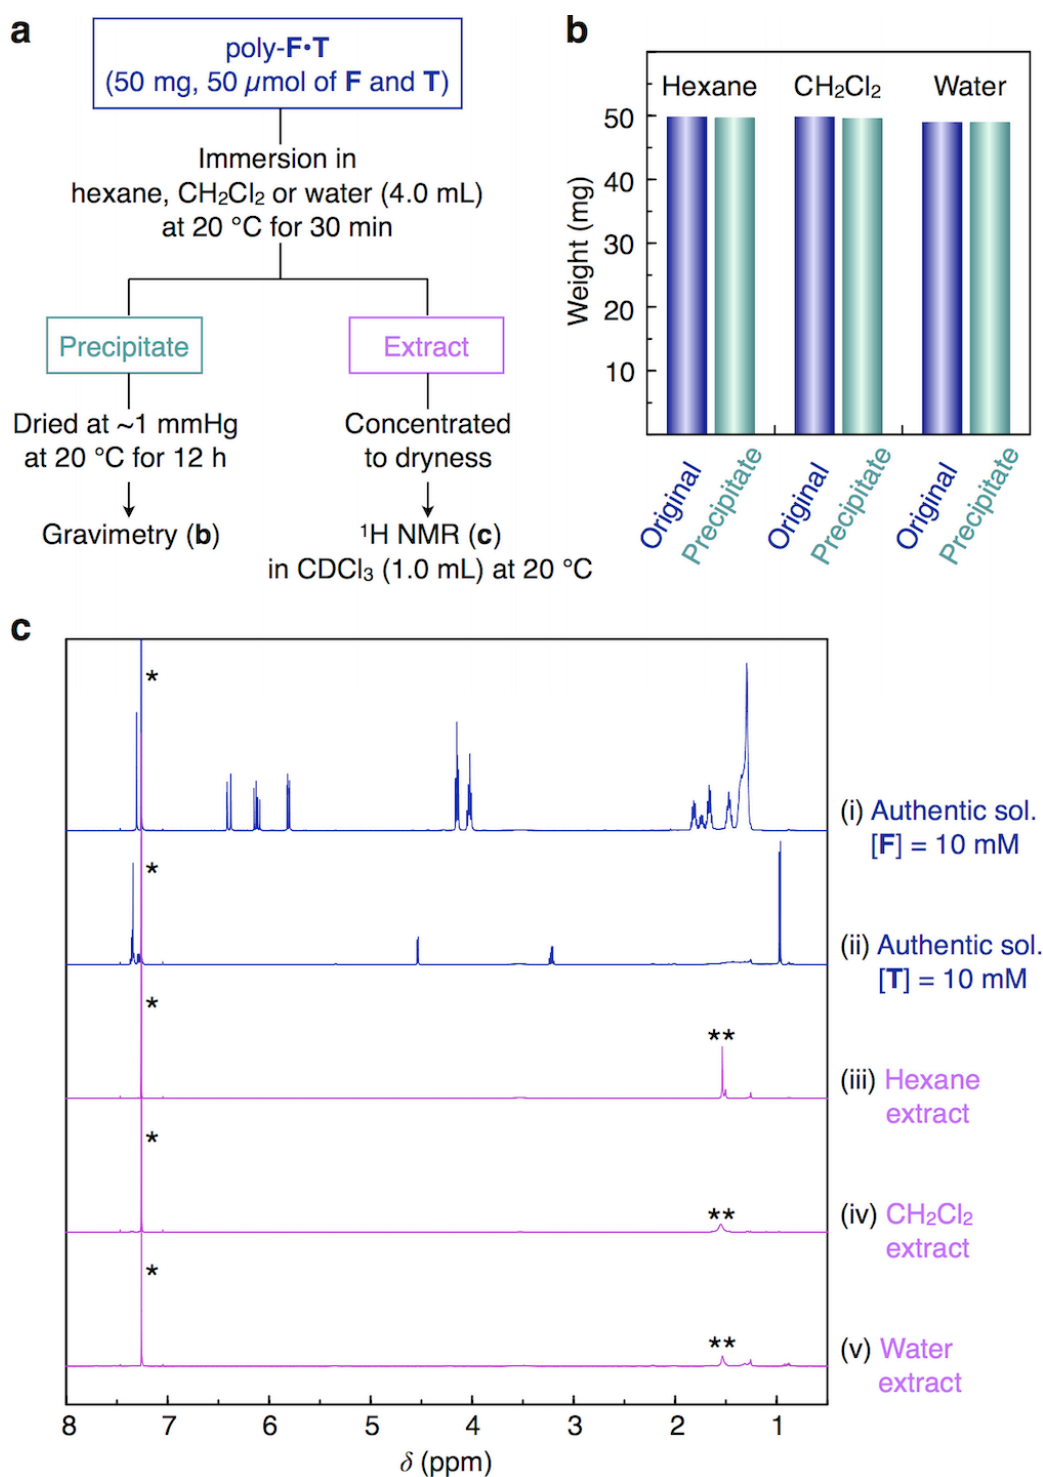

**Supplementary Fig. 2** | Solubility tests of a film of poly-F•T with a magnetically oriented structure. **a**, Procedure of the solubility tests. **b**, Changes in the weight of the films of poly-F•T through the immersion in hexane, CH<sub>2</sub>Cl<sub>2</sub> and water. **c**, <sup>1</sup>H NMR spectra in CDCl<sub>3</sub> at 20 °C of the authentic solutions of F (i) and T (ii) and the extracts of the immersion in hexane (iii), CH<sub>2</sub>Cl<sub>2</sub> (iv) and water (v). In **c**, \* and \*\* denote the signals of residual CHCl<sub>3</sub> and H<sub>2</sub>O, respectively.

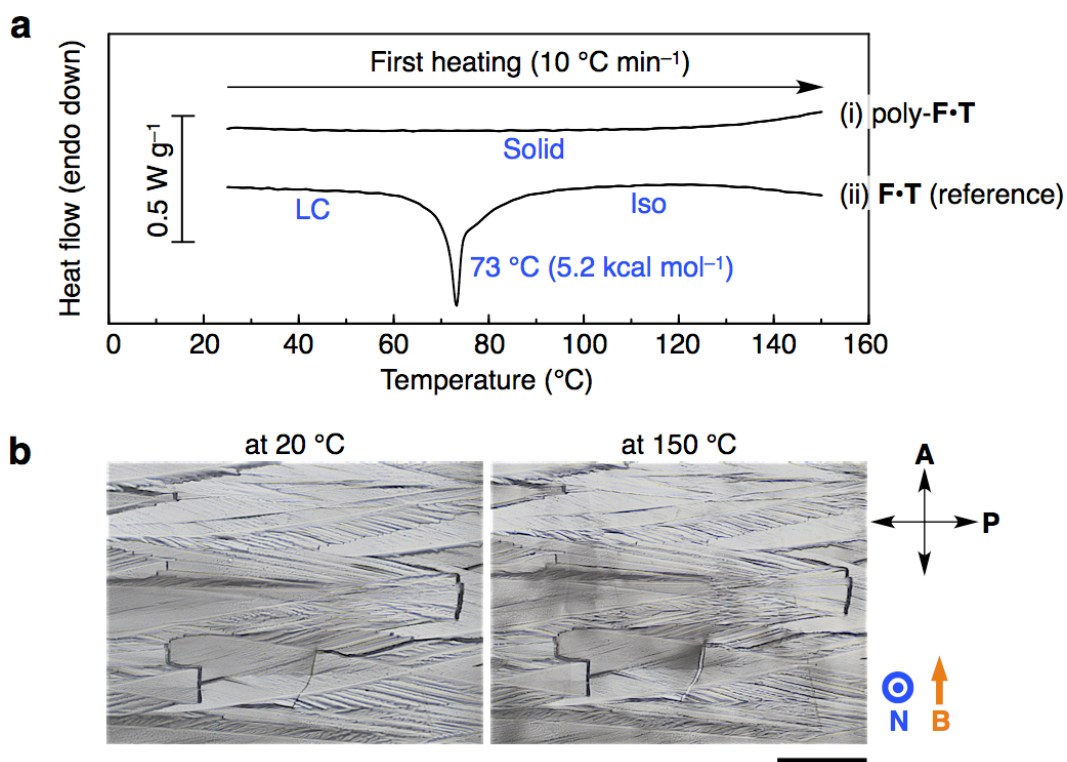

**Supplementary Fig. 3** | Meltability tests of a film of poly-**F•T** with a magnetically oriented structure ( $\sim 10 \mu\text{m}$  thick). **a**, DSC traces at the first heating (scanning rate,  $10 \text{ }^\circ\text{C min}^{-1}$ ) of poly-**F•T** (i) and unpolymerized **F•T** as a reference (ii). Phases, transition temperature and enthalpy change (in parentheses) are indicated in blue. **b**, POM images of poly-**F•T** at the first heating (scanning rate,  $10 \text{ }^\circ\text{C min}^{-1}$ ) taken at 20 and 150  $^\circ\text{C}$ . Scale bar:  $500 \mu\text{m}$ . **B**: Magnetic field applied during the LC film-preparation process. **N**: Normal vector of the film surface. **P**: Polarizer direction. **A**: Analyzer direction.

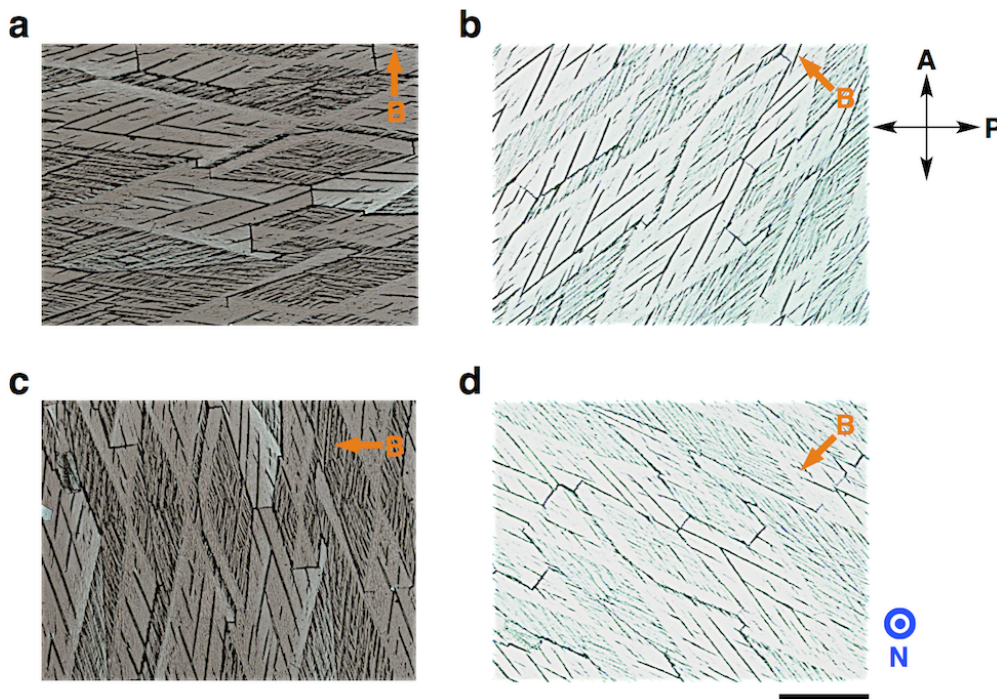

**Supplementary Fig. 4** | POM images (under crossed Nicols) of a film of poly-F•T with a magnetically oriented structure ( $\sim 10 \mu\text{m}$  thick) with varying the angle between **A** and **B**. **a**,  $0^\circ$ . **b**,  $45^\circ$ . **c**,  $90^\circ$ . **d**  $135^\circ$ . Scheme Bar:  $500 \mu\text{m}$ . **B**: Magnetic field applied during the LC film-preparation process. **N**: Normal vector of the film surface. **P**: Polarizer direction. **A**: Analyzer direction.



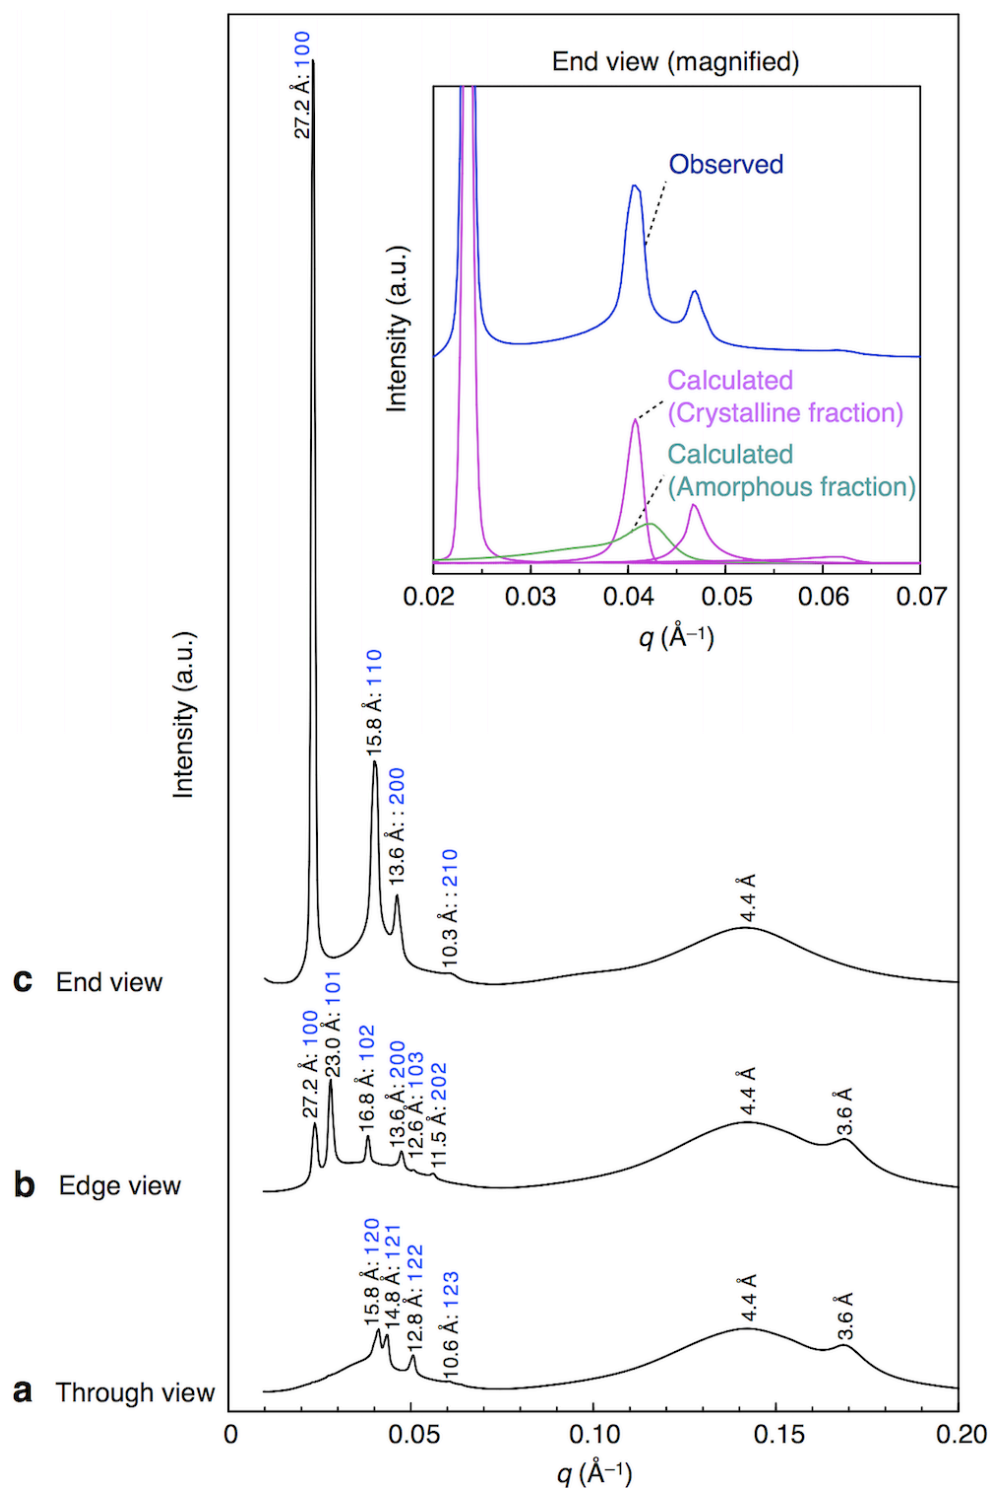

**Supplementary Fig. 5** | 1D XRD profiles of a film of poly-F•T with a magnetically oriented structure (3 mm × 3 mm, ~20 μm thick). **a**, Through view (X-ray // **N**, X-ray ⊥ **B**). **b**, Edge view (X-ray ⊥ **N**, X-ray // **B**). **c**, End view (X-ray ⊥ **N**, X-ray ⊥ **B**). Miller indices are given in blue. Inset: a small-angle region ( $q = 0.02\text{--}0.07 \text{\AA}^{-1}$ ) of the 1D XRD profile of the end view (**c**), where the observed data (navy) were curve-fitted and decomposed into four crystalline (magenta) and an amorphous (green) peaks using Rigaku PDXL software<sup>S1</sup>.

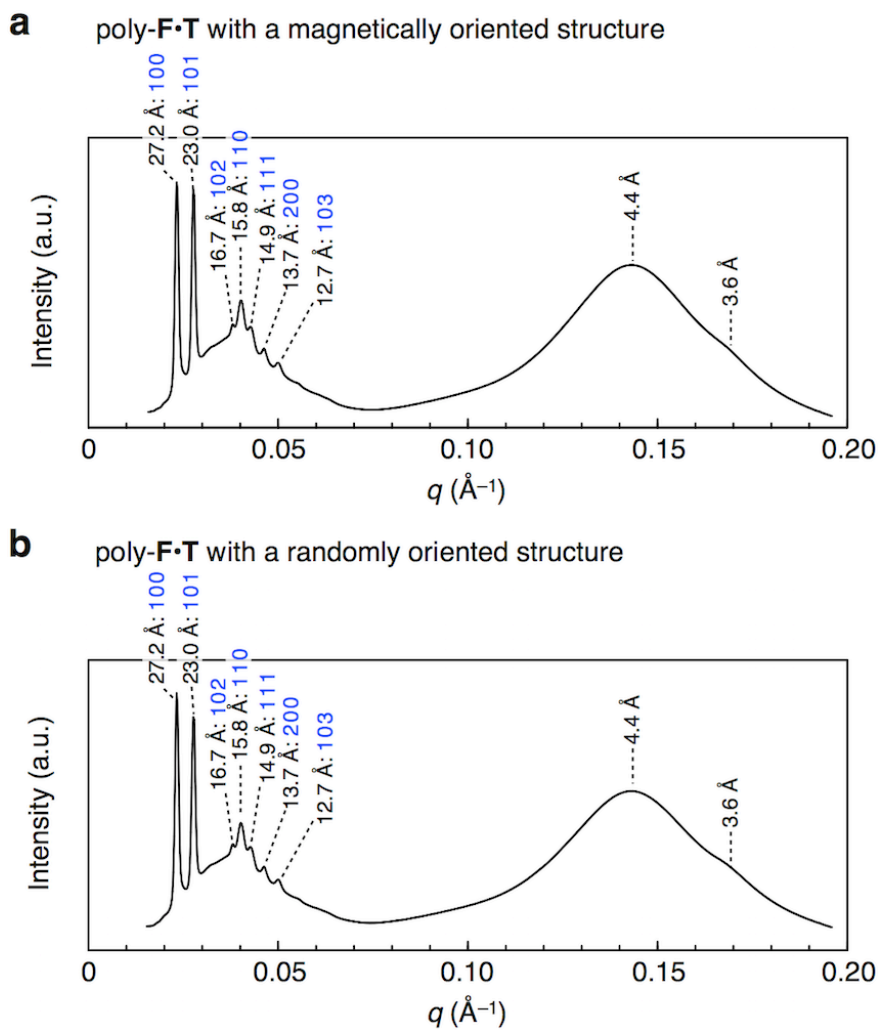

**Supplementary Fig. 6** | 1D XRD profiles of powdered samples of poly-F•T. **a**, Powder prepared from a film of poly-F•T with a magnetically oriented structure. **b**, Powder prepared from a film of poly-F•T with a randomly oriented structure. Miller indices are given in blue.

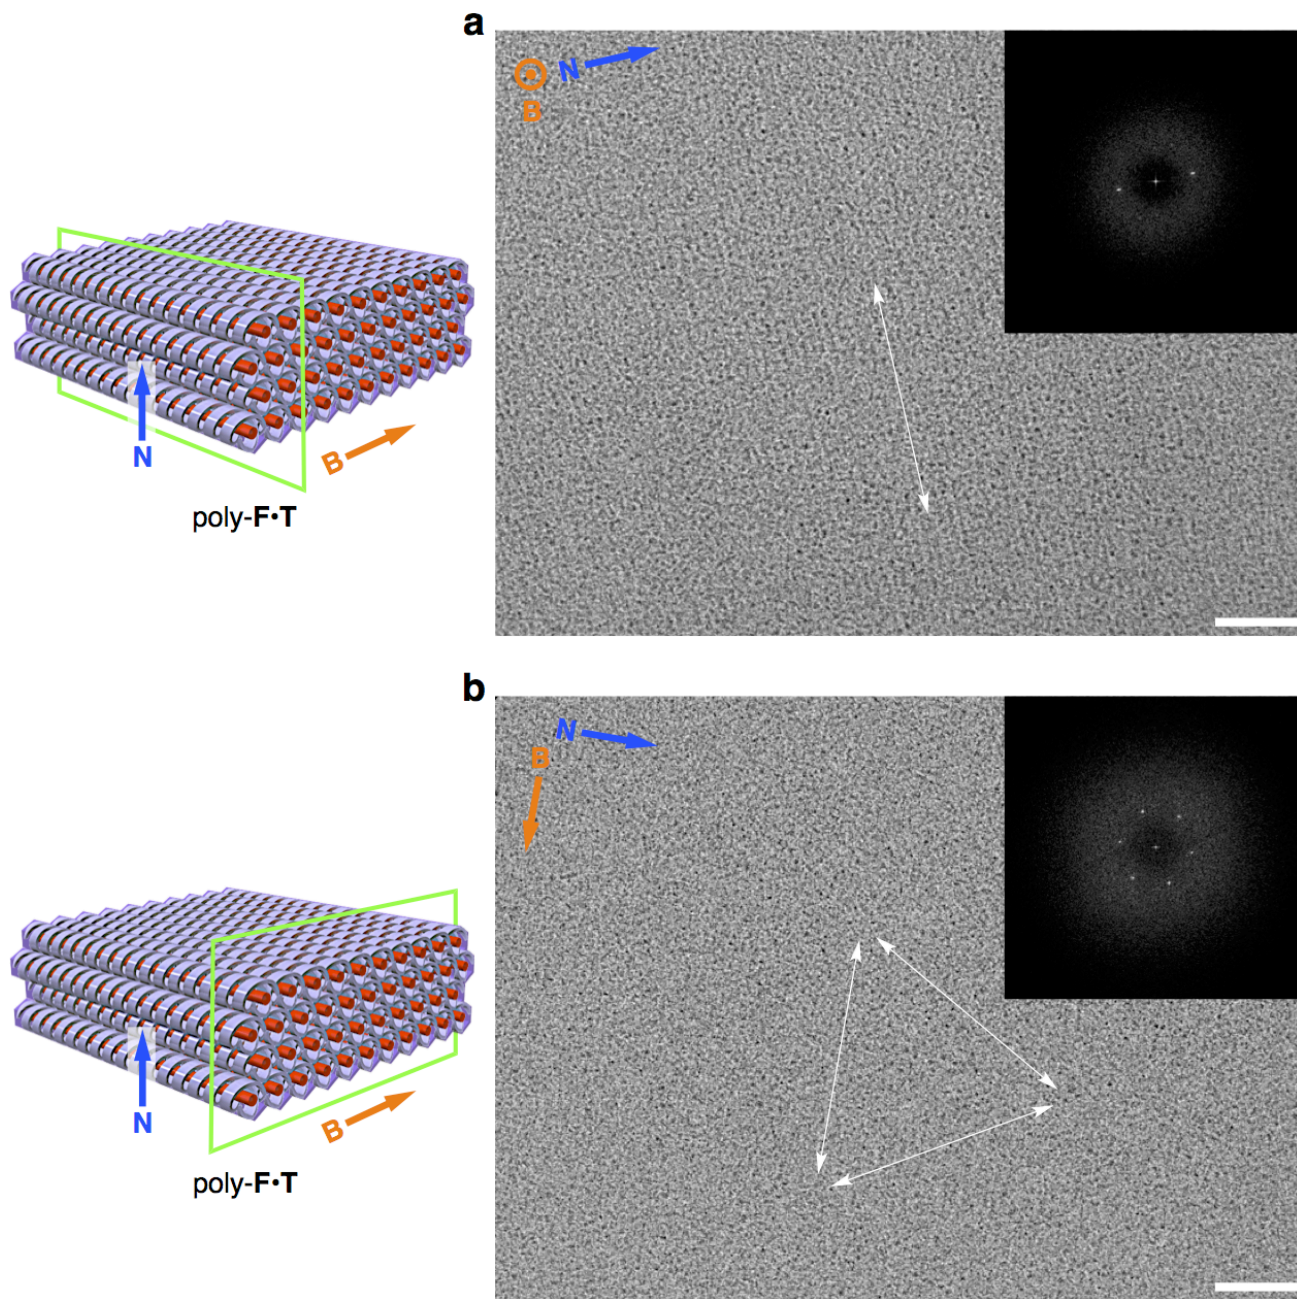

**Supplementary Fig. 7** | TEM images of microtomed sections of poly-F·T with a magnetically oriented structure. **a**, Microtomed perpendicular to **B**. **b**, Microtomed parallel to **B**. **B**: Magnetic field applied during the LC film-preparation process. **N**: Normal vector of the film surface. Scale bar: 20 nm. White arrow: guide for the eye to show the direction of periodic lines. Inset: Fourier transform of the image.



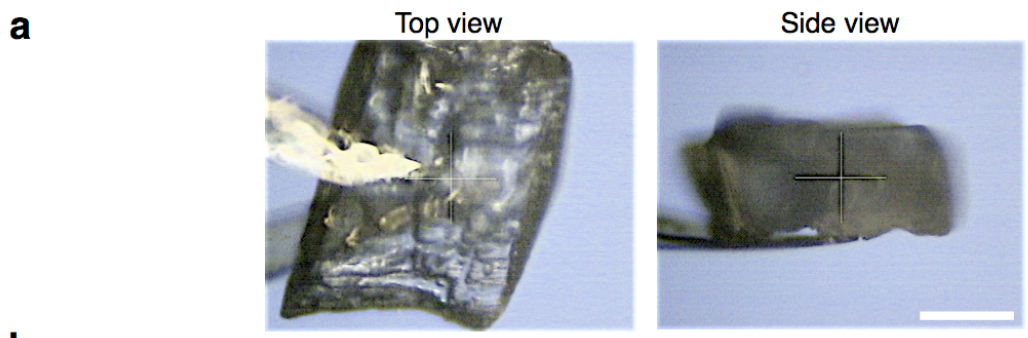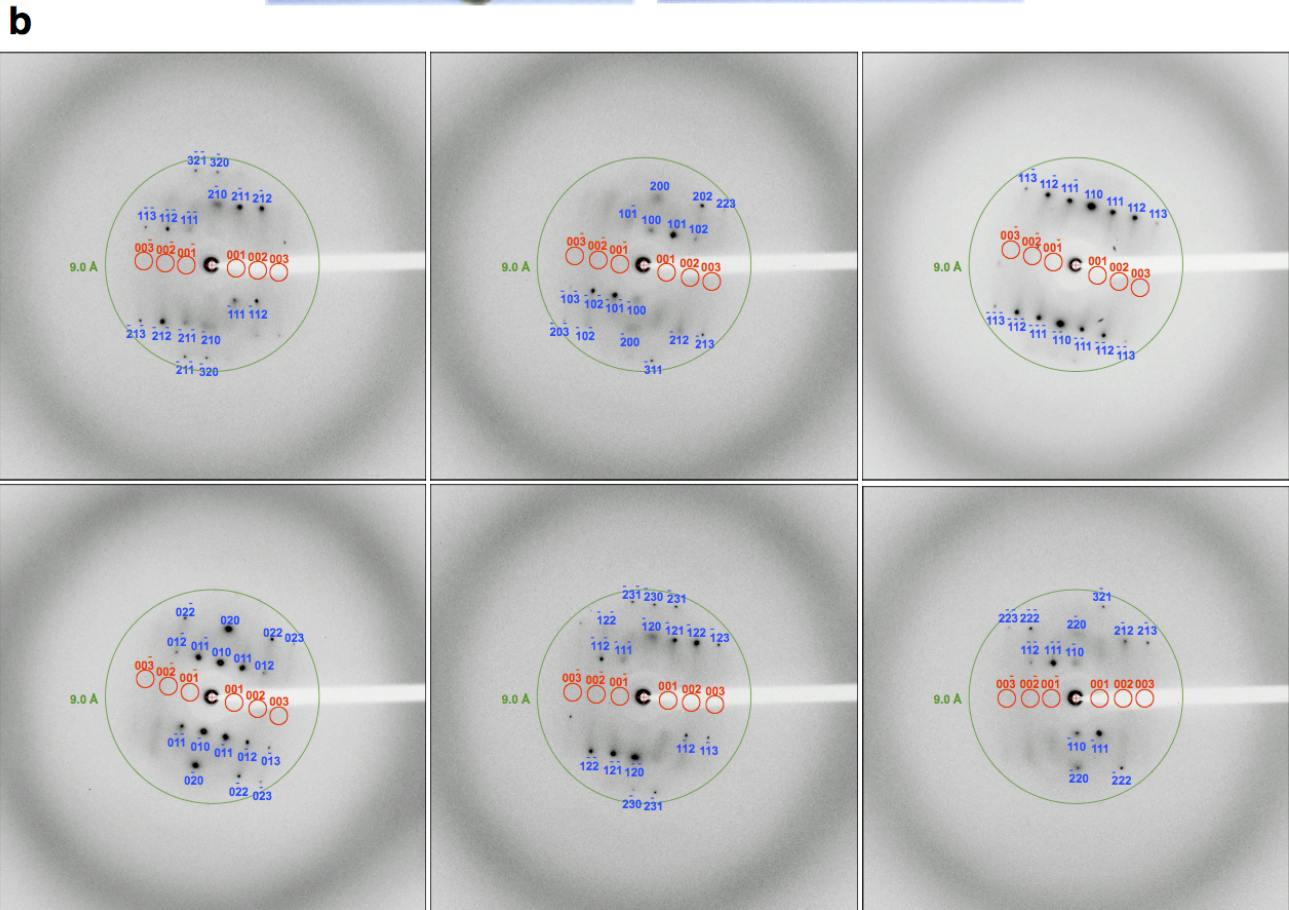

**Supplementary Fig. 8** | 2D XRD measurement for a monodomain clump of poly-F•T (0.7 mm × 0.6 mm × 0.2 mm) for the determination of the space group of poly-F•T. **a**, Pictures of a monodomain clump trimmed from a film of poly-F•T with a magnetically oriented structure. Scale bar: 0.2 mm. **b**, Typical frames of the collected data. The red circles display the predicted positions for the 001, 002 and 003 reflections. The green circle indicates 9.00 Å resolution ( $2\theta = 6.0^\circ$ ). Miller indices are given in blue.



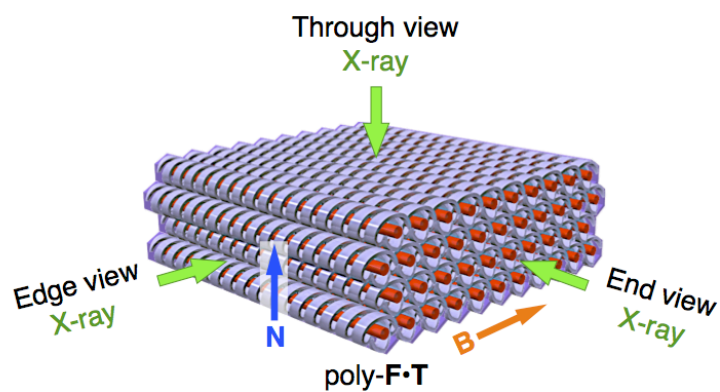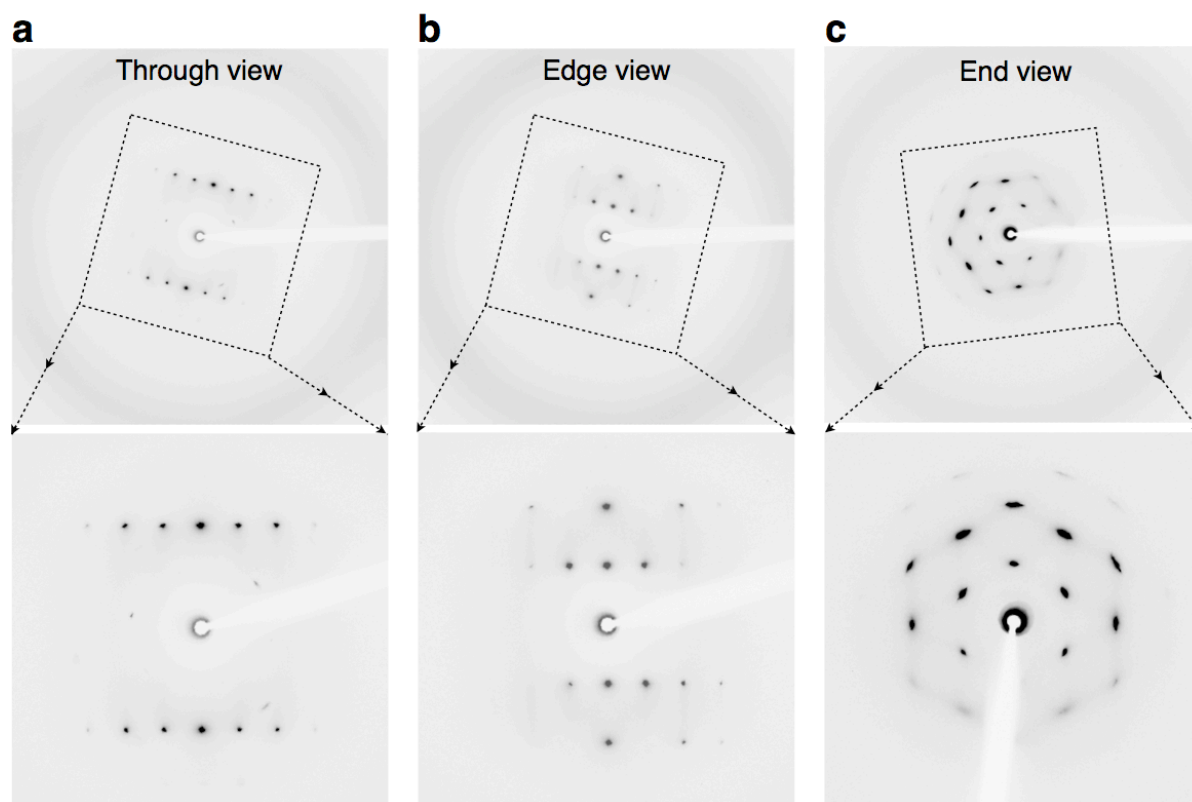

**Supplementary Fig. 9** | 2D XRD images of a monodomain clump of poly-F•T (0.7 mm × 0.6 mm × 0.2 mm). **a**, Through view image (X-ray // **N**, X-ray ⊥ **B**). **b**, Edge view image (X-ray ⊥ **N**, X-ray // **B**). **c**, End view image (X-ray ⊥ **N**, X-ray ⊥ **B**). **B**: Magnetic field applied during the LC film-preparation process. **N**: Normal vector of the film surface.

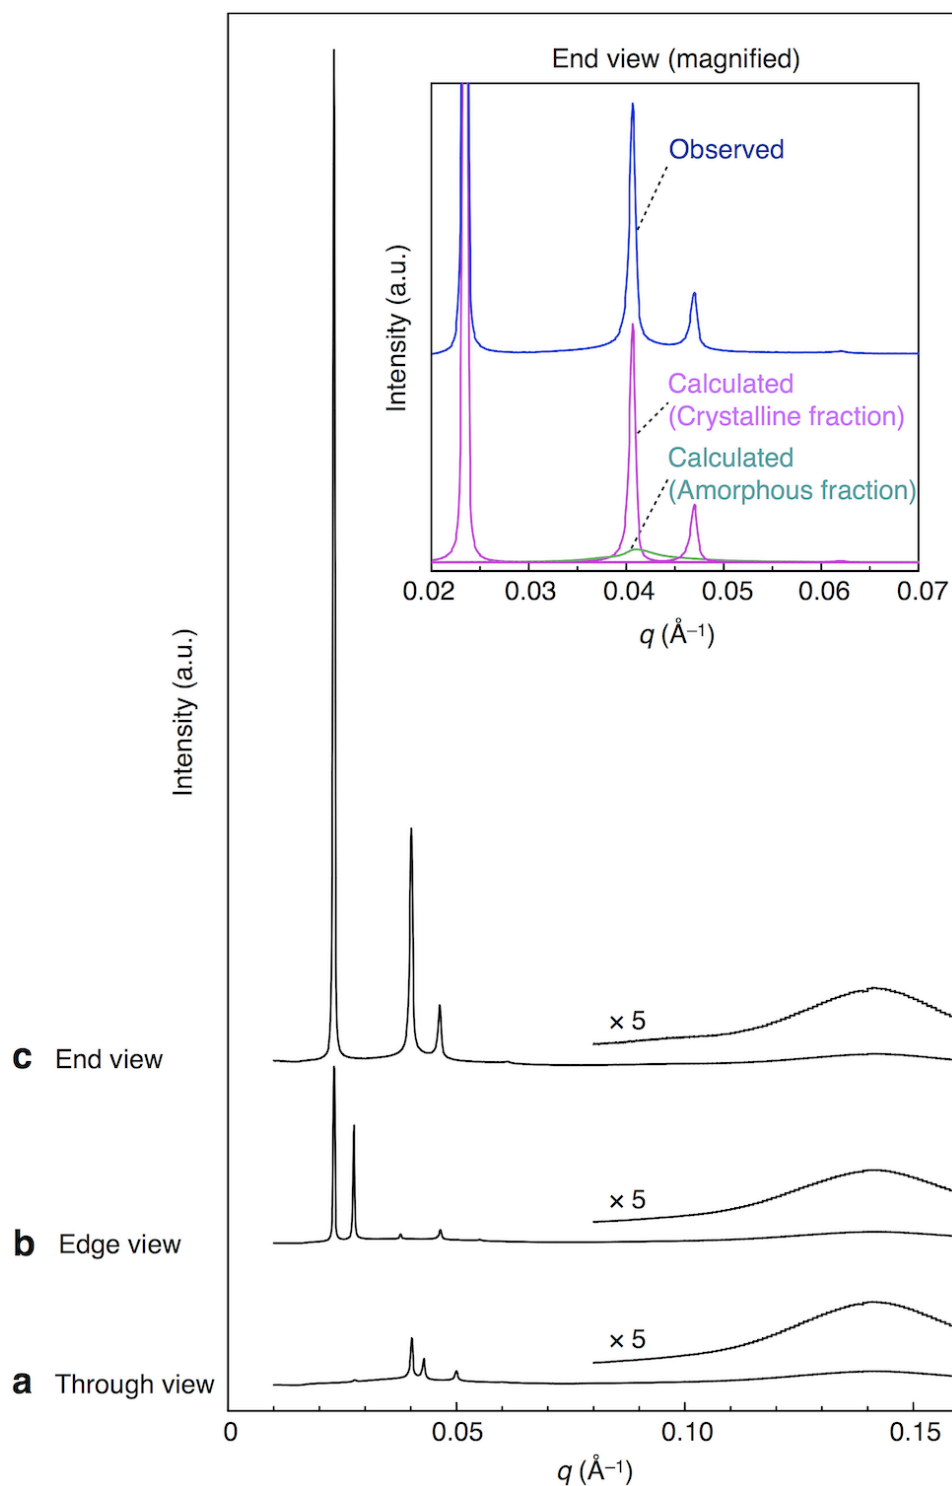

**Supplementary Fig. 10** | 1D XRD profiles of a monodomain clump of poly-F•T (0.7 mm  $\times$  0.6 mm  $\times$  0.2 mm). **a**, Through view (X-ray // **N**, X-ray  $\perp$  **B**). **b**, Edge view (X-ray  $\perp$  **N**, X-ray // **B**). **c**, End view (X-ray  $\perp$  **N**, X-ray  $\perp$  **B**). For Miller indices, see Supplementary Fig. 5. Inset: a small-angle region ( $q = 0.02\text{--}0.07 \text{\AA}^{-1}$ ) of the 1D XRD profile of the end view (**c**), where the observed data (navy) were curve-fitted and decomposed into four crystalline (magenta) and one amorphous (green) peaks using Rigaku PDXL software<sup>S1</sup>.

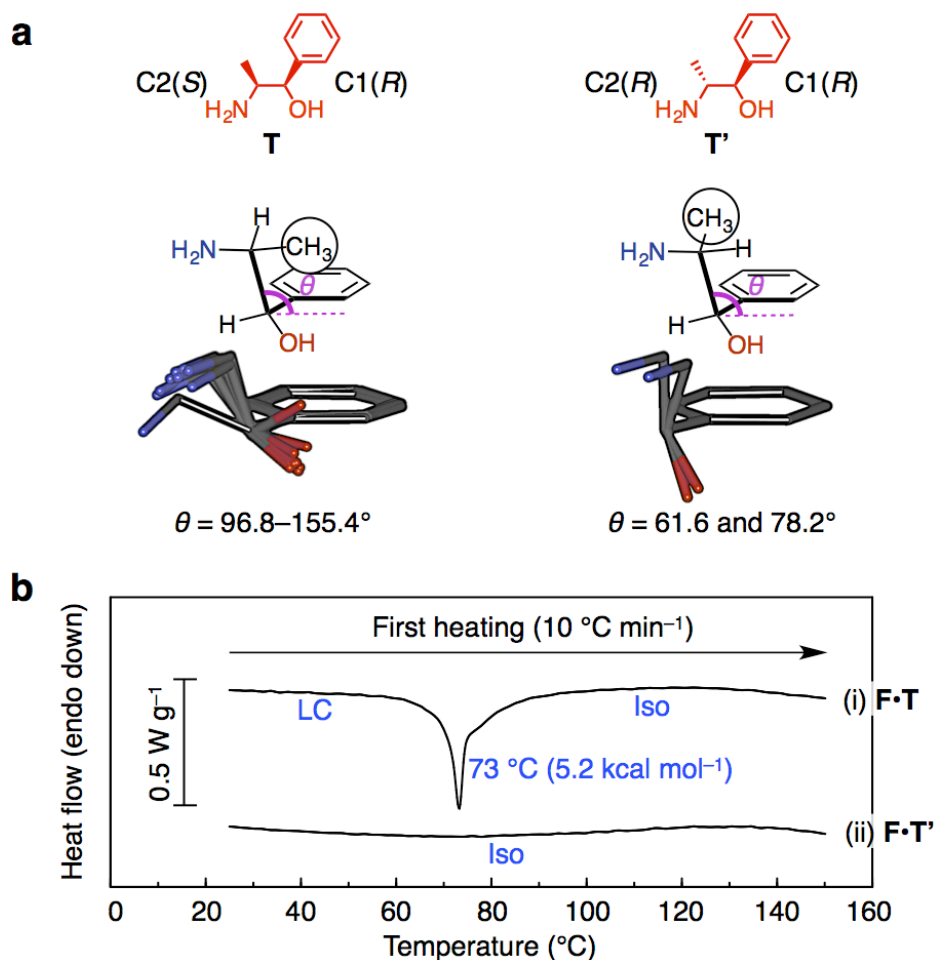

**Supplementary Fig. 11** | Thermal behaviors of the LC salt **F•T** and an analogous salt **F•T'**. **a**, Conformational preferences of **T** and **T'**. Superimposition of the structures retrieved from the Cambridge Structure Database (CSD) for the salts of **T** (CSD entry code: *amagaw*, *jastus*, *mixpeac*, *nephcl*, *qawsuc*, *ugeyua*, *vejqeg*) and the salts of **T'** (CSD entry code: *gevneb*, *jasvaa*)<sup>S2</sup>. Hydrogen atoms and the C2-methyl groups are omitted for clarity. **b**, DSC traces at the first heating (scanning rate,  $10\text{ }^\circ\text{C min}^{-1}$ ) of **F•T** (i) and **F•T'** (ii). Phases, transition temperature and enthalpy change (in parentheses) are indicated in blue.

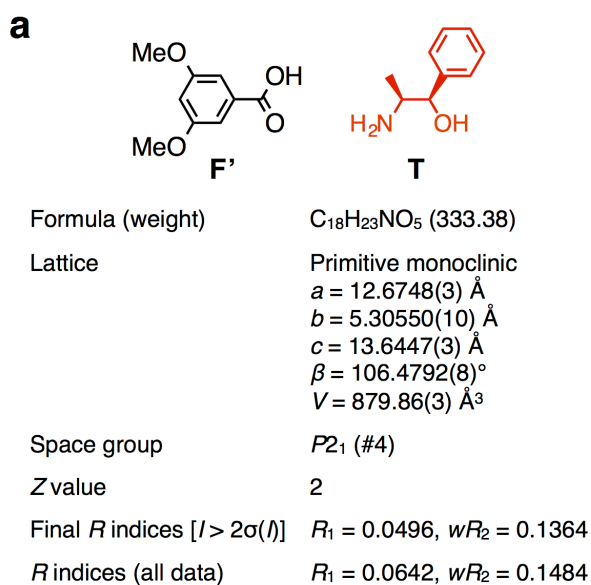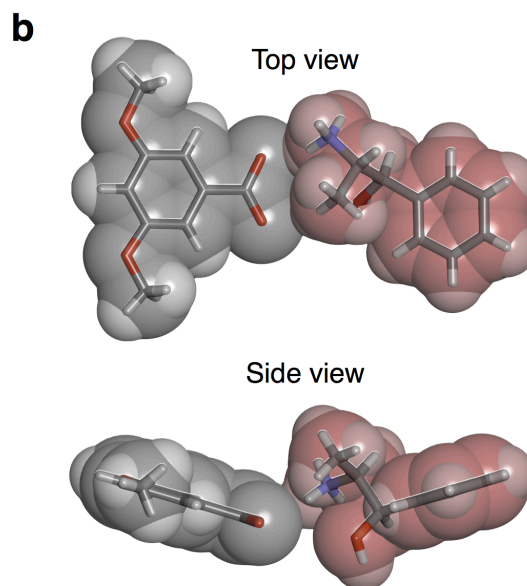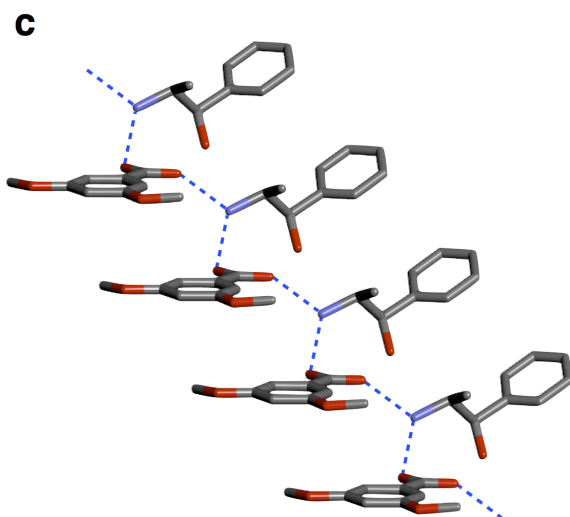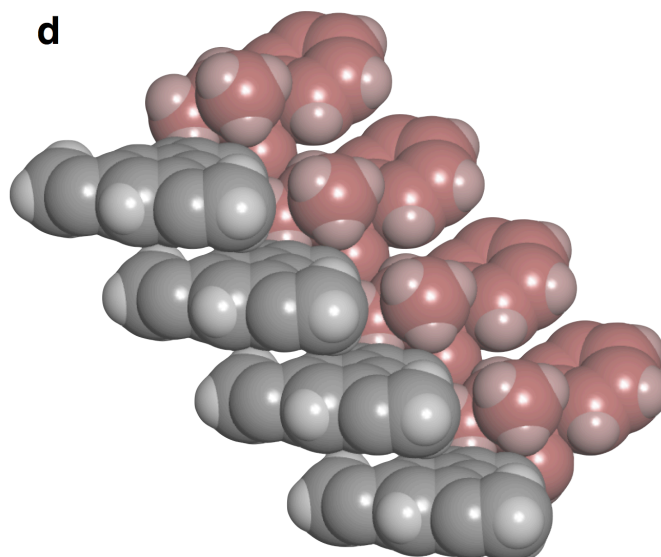

**Supplementary Fig. 12** | X-ray crystal structure of an analogous salt **F'·T** (CCDC deposition no. 1059112). A single crystal of **F'·T** used for the X-ray crystallographic study was obtained by vapor diffusion from tetrahydrofuran and hexane. **a**, Chemical structures of the salt **F'·T** and summary of the crystal structure. **b**, A salt-pair unit of **F'** and **T**. **c,d**, Assembly of the salt pairs of **F'** and **T** in stick (**c**) and CPK (**d**) representations. In **c**, hydrogen bonds are indicated by blue dotted lines, and hydrogen atoms are omitted for clarity.



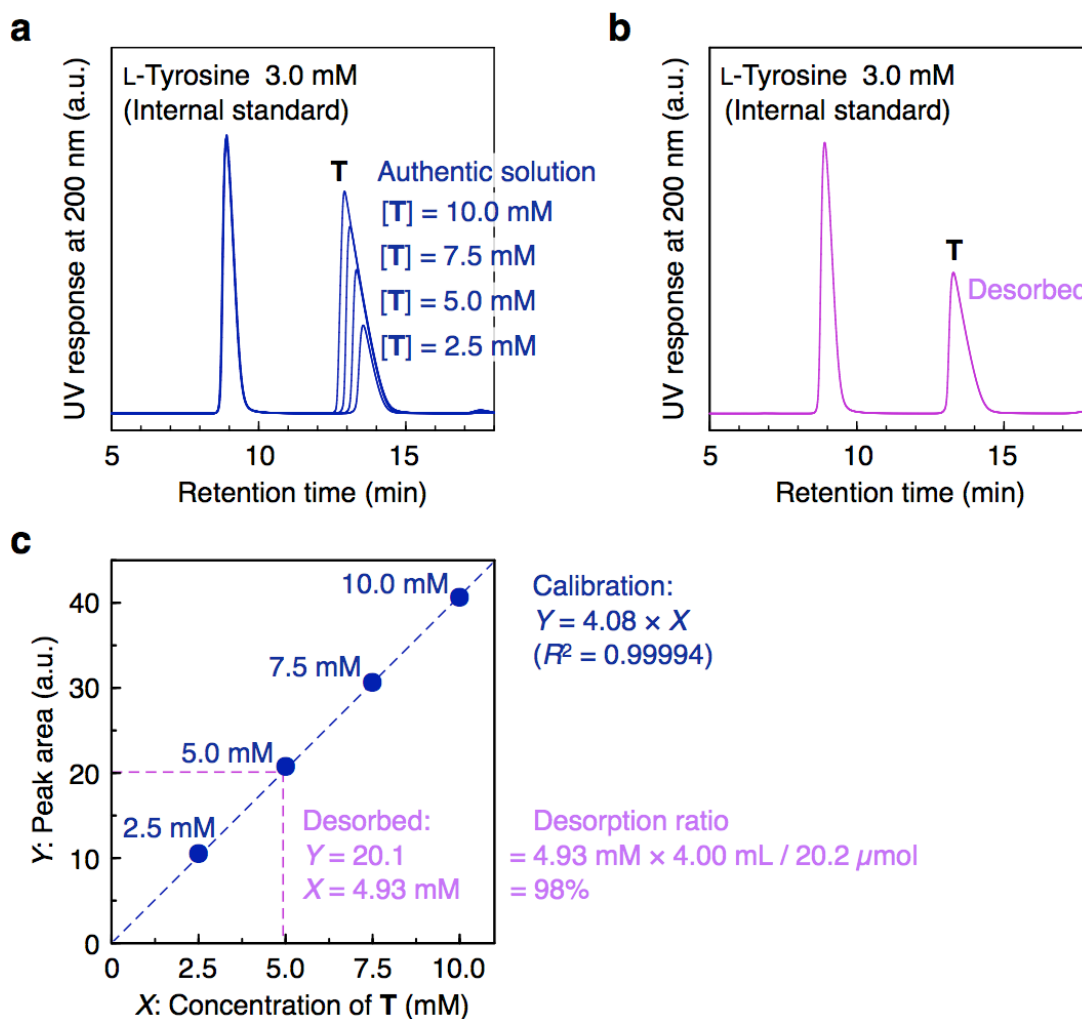

**Supplementary Fig. 13** | HPLC quantification of **T** desorbed from the films of poly-**F•T** with a magnetically oriented structure ( $\sim 10 \mu\text{m}$  thick, 20.1 mg, containing 20.2  $\mu\text{mol}$  of **T** and the  $-\text{CO}_2\text{H}$  groups). **a,b**, HPLC traces of the authentic solutions of **T** (**a**, [**T**] = 2.5, 5.0, 7.5 and 10.0 mM in pH 2.0 aqueous  $\text{HClO}_4$ ) and the solution of **T** desorbed from the film of poly-**F•T** (**b**, Methods section in the main text). L-Tyrosine (3.0 mM) was used as an internal standard. **c**, Calibration curve created from the data in **a** (navy) and the desorption ratio of **T** calculated from the data in **b** (magenta).

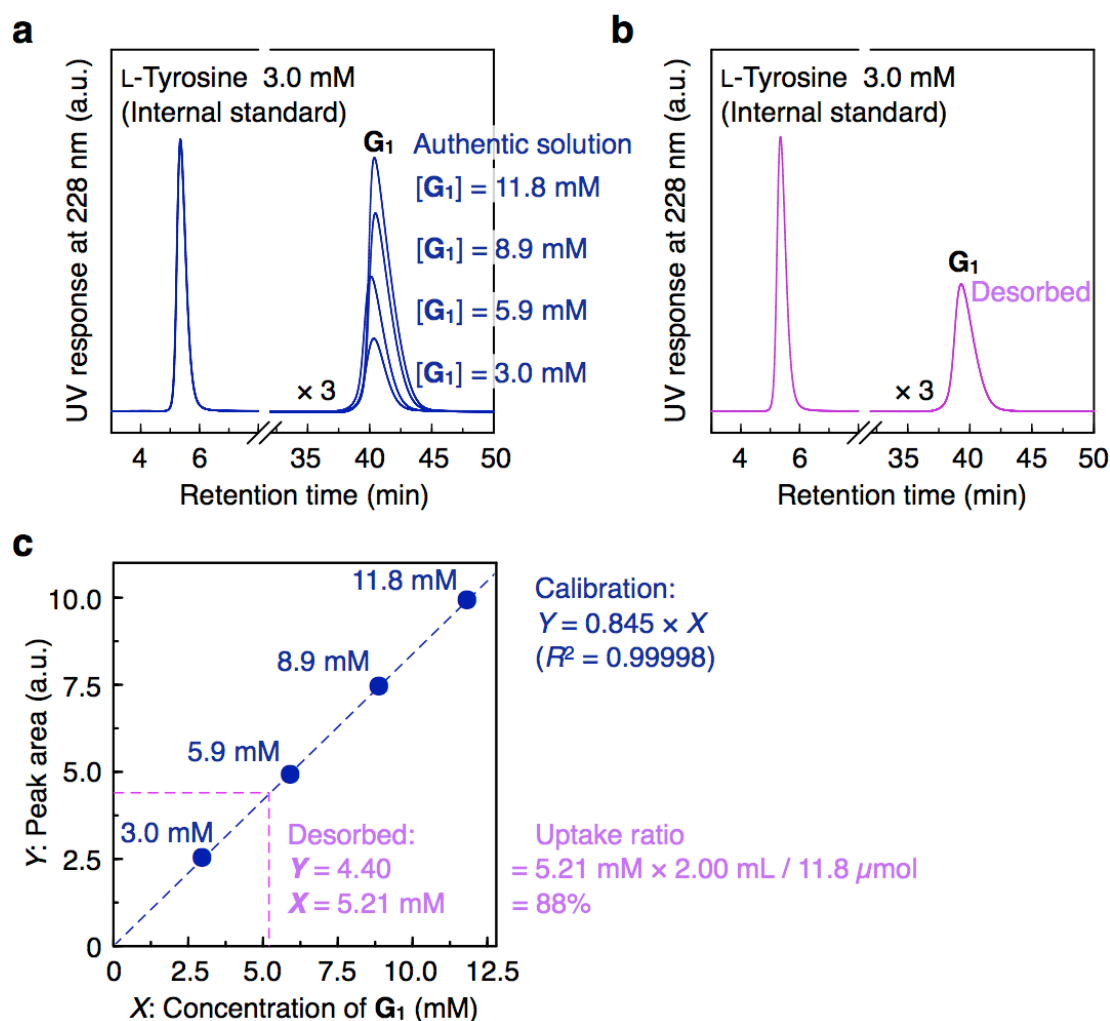

**Supplementary Fig. 14** | HPLC quantification of  $G_1$  adsorbed to the films of poly- $F$ ·vacant with a magnetically oriented structure ( $\sim 10 \mu\text{m}$  thick, 10.0 mg, containing  $11.8 \mu\text{mol}$  of the  $-\text{CO}_2\text{H}$  groups). **a,b**, HPLC traces of the authentic solutions of  $G_1$  (**a**,  $[G_1] = 3.0, 5.9, 8.9$  and  $11.8 \text{ mM}$  in pH 2.0 aqueous  $\text{HClO}_4$ ) and the solution of  $G_1$  desorbed from the film of poly- $F$ · $G_1$  (**b**, Methods section in the main text). L-Tyrosine (3.0 mM) was used as an internal standard. **c**, Calibration curve created from the data in **a** (navy) and the uptake ratio of  $G_1$  calculated from the data in **b** (magenta).

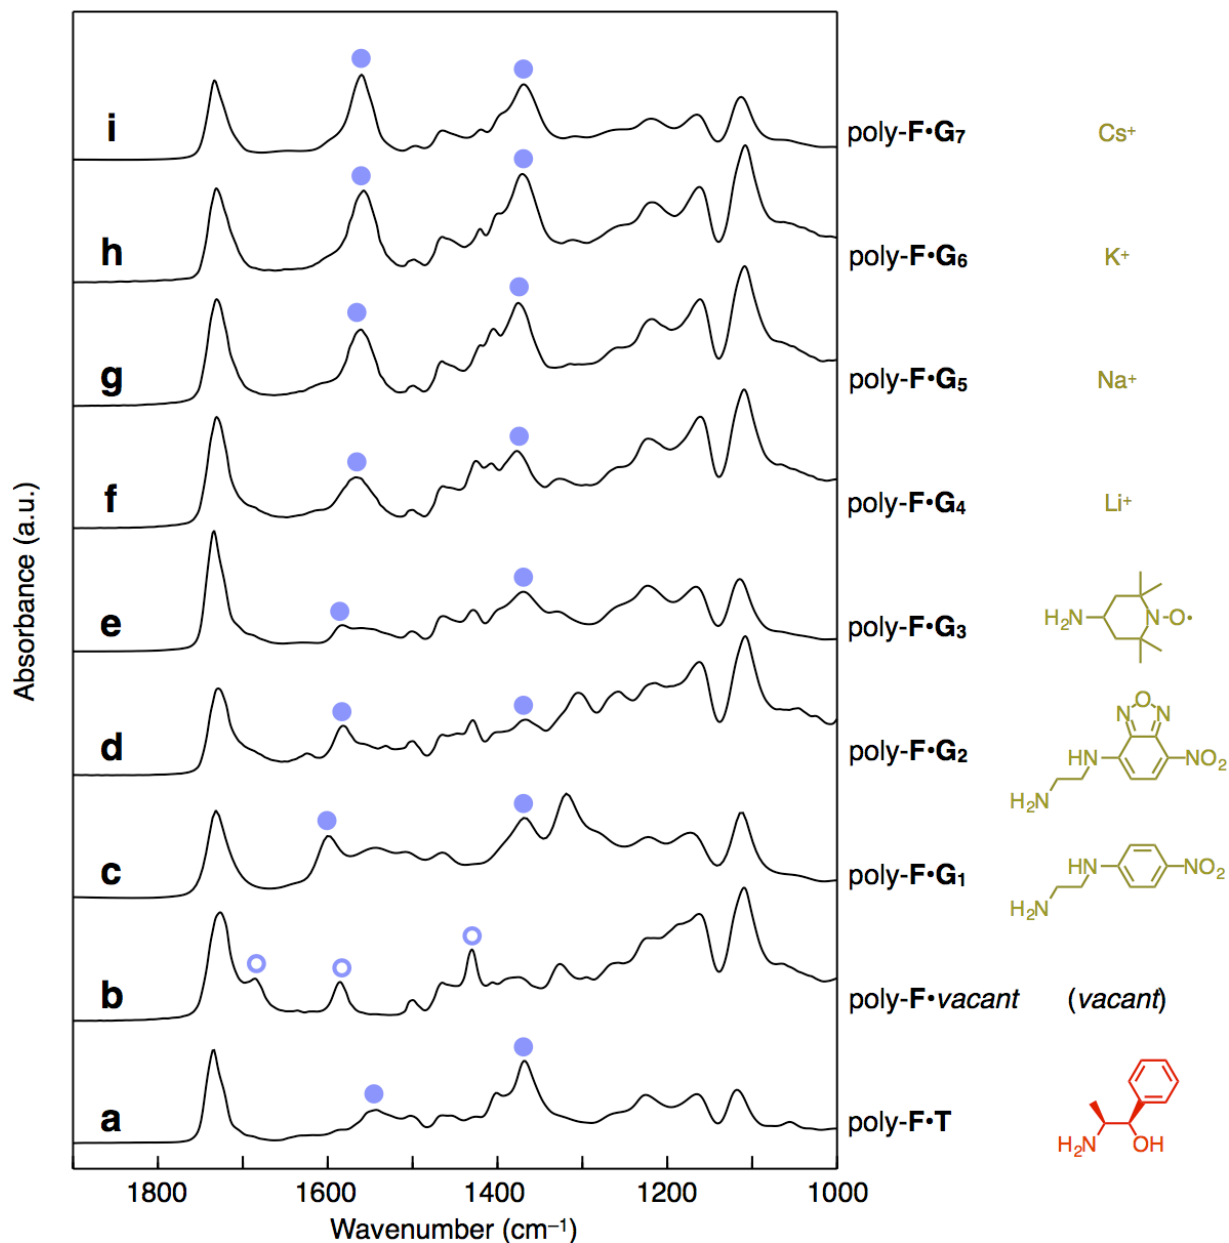

**Supplementary Fig. 15** | IR spectra of films of poly-F with magnetically oriented structures ( $\sim 10 \mu\text{m}$  thick). **a**, poly-F·T. **b**, poly-F·vacant. **c**, poly-F·G<sub>1</sub>. **d**, poly-F·G<sub>2</sub>. **e**, poly-F·G<sub>3</sub>. **f**, poly-F·G<sub>4</sub>. **g**, poly-F·G<sub>5</sub>. **h**, poly-F·G<sub>6</sub>. **i**, poly-F·G<sub>7</sub>. Filled circles: absorption attributable to the carboxylate ions forming salt pairs with guest molecules. Open circles: absorption attributable to the free carboxylic acid groups.

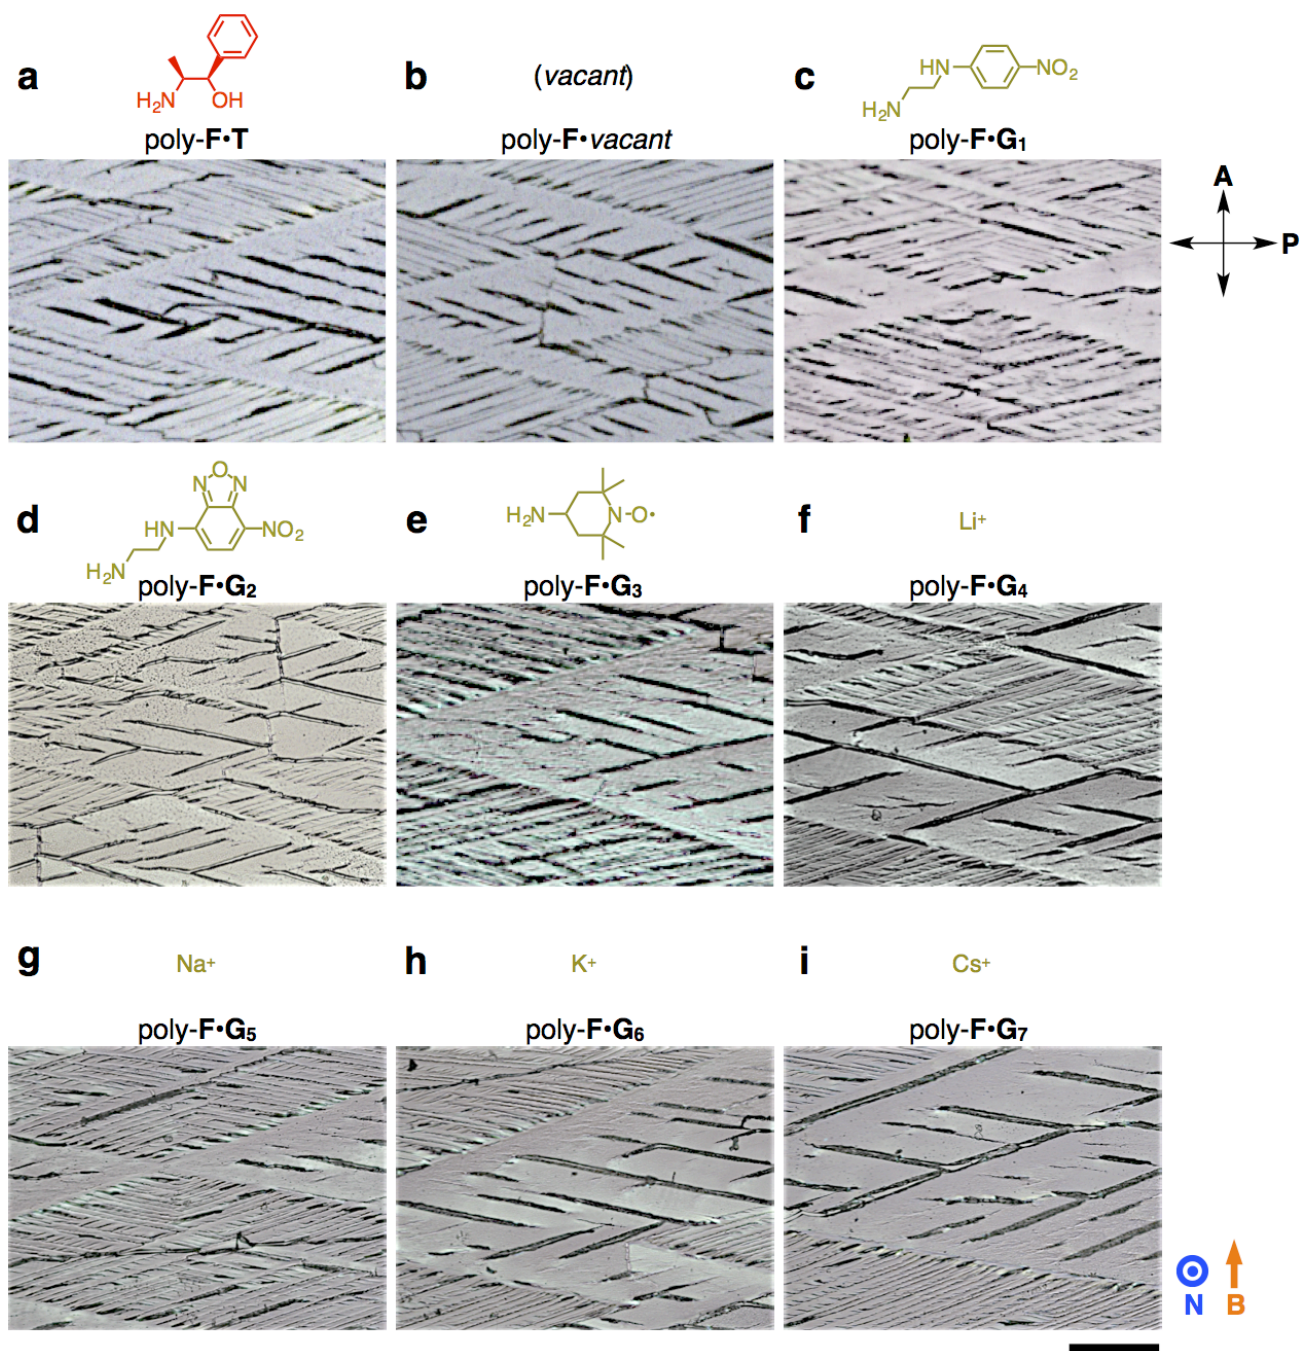

**Supplementary Fig. 16** | POM images (under crossed Nicols) of films of poly-F with magnetically oriented structures ( $\sim 10 \mu\text{m}$  thick). **a**, poly-F•T. **b**, poly-F•vacant. **c**, poly-F•G<sub>1</sub>. **d**, poly-F•G<sub>2</sub>. **e**, poly-F•G<sub>3</sub>. **f**, poly-F•G<sub>4</sub>. **g**, poly-F•G<sub>5</sub>. **h**, poly-F•G<sub>6</sub>. **i**, poly-F•G<sub>7</sub>. Scale bar:  $200 \mu\text{m}$ . **B**: Magnetic field applied during the LC film-preparation process. **N**: Normal vector of the film surface. **P**: Polarizer direction. **A**: Analyzer direction.



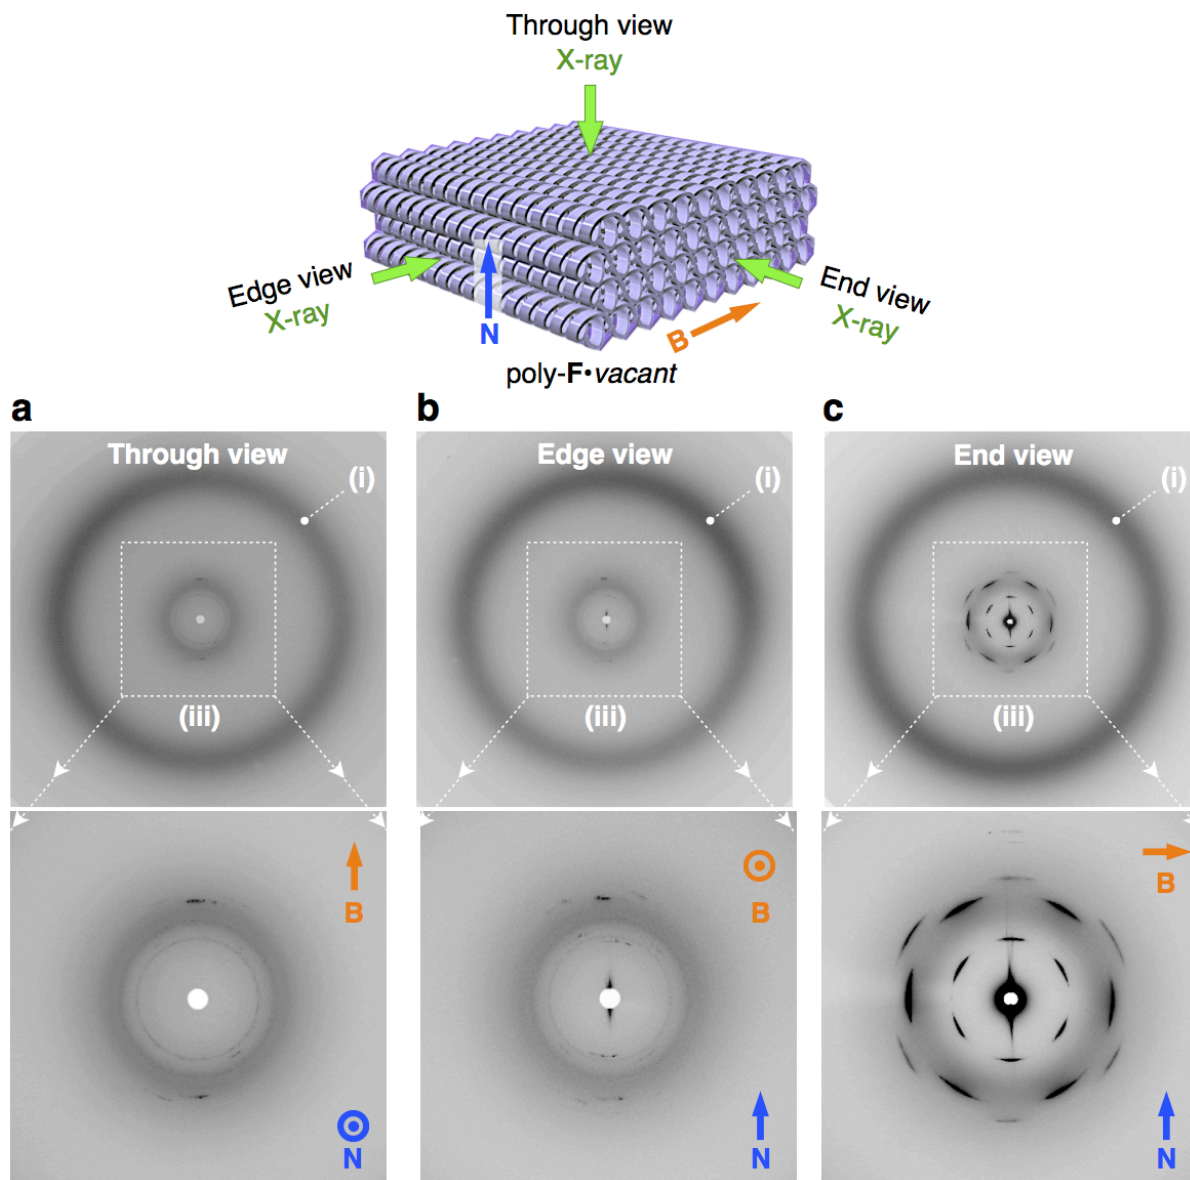

**Supplementary Fig. 17** | 2D XRD images of a film of poly-F•vacant with a magnetically oriented structure (3 mm × 3 mm, ~20 μm thick). **a**, Through view image (X-ray //  $\mathbf{N}$ , X-ray  $\perp$   $\mathbf{B}$ ). **b**, Edge view image (X-ray  $\perp$   $\mathbf{N}$ , X-ray //  $\mathbf{B}$ ). **c**, End view image (X-ray  $\perp$   $\mathbf{N}$ , X-ray  $\perp$   $\mathbf{B}$ ).  $\mathbf{B}$ : Magnetic field applied during the LC film-preparation process.  $\mathbf{N}$ : Normal vector of the film surface.

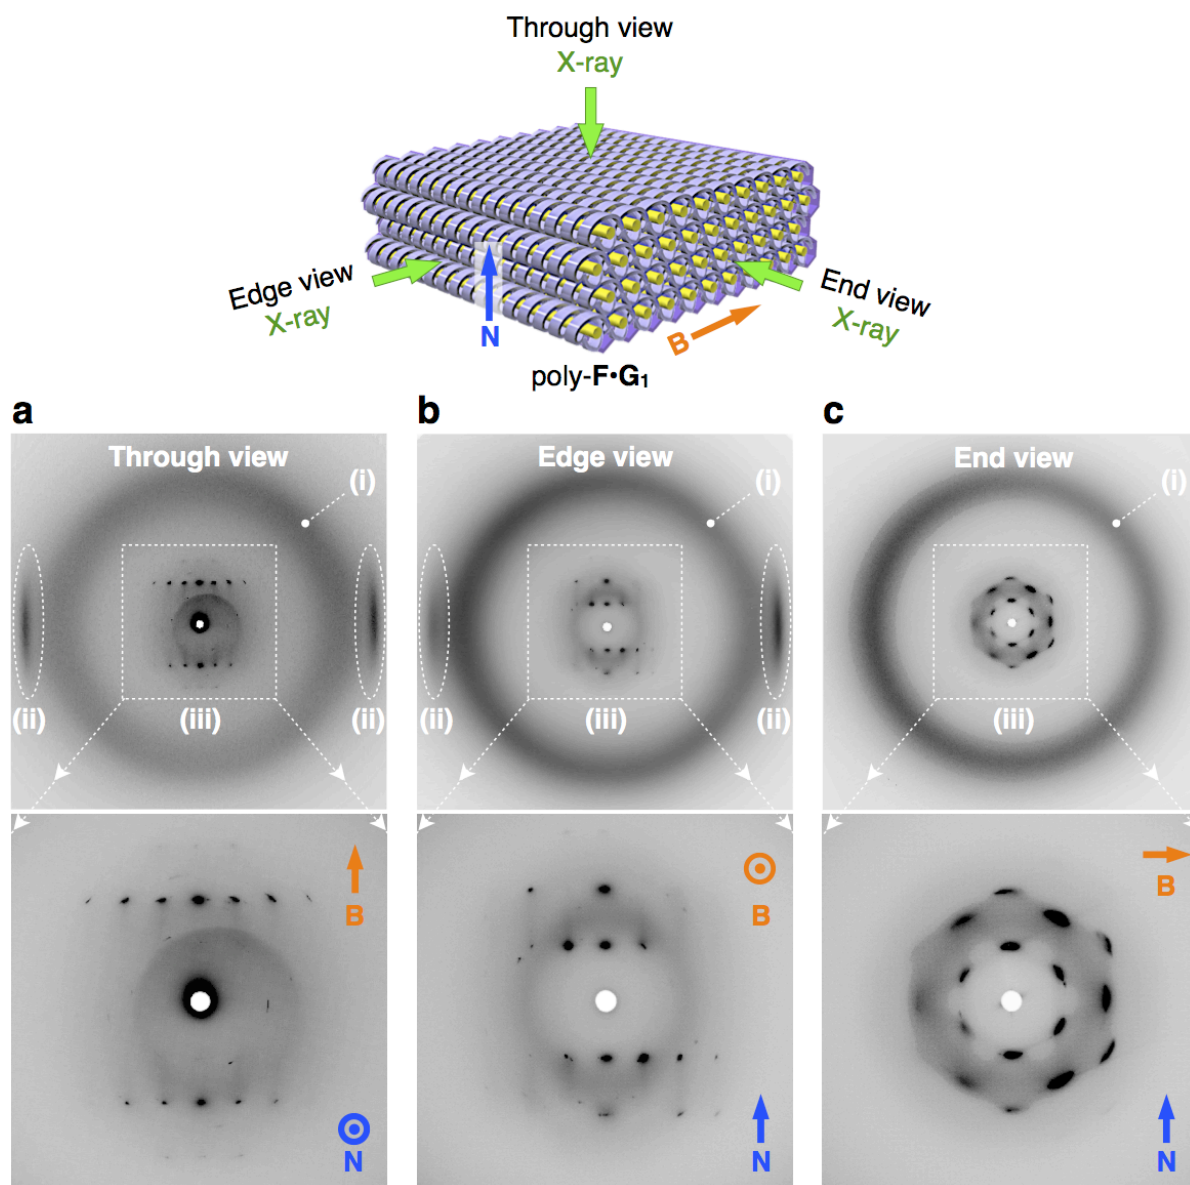

**Supplementary Fig. 18** | 2D XRD images of a film of poly-F•G<sub>1</sub> with a magnetically oriented structure (3 mm × 3 mm, ~20 μm thick). **a**, Through view image (X-ray // **N**, X-ray ⊥ **B**). **b**, Edge view image (X-ray ⊥ **N**, X-ray // **B**). **c**, End view image (X-ray ⊥ **N**, X-ray ⊥ **B**). **B**: Magnetic field applied during the LC film-preparation process. **N**: Normal vector of the film surface.

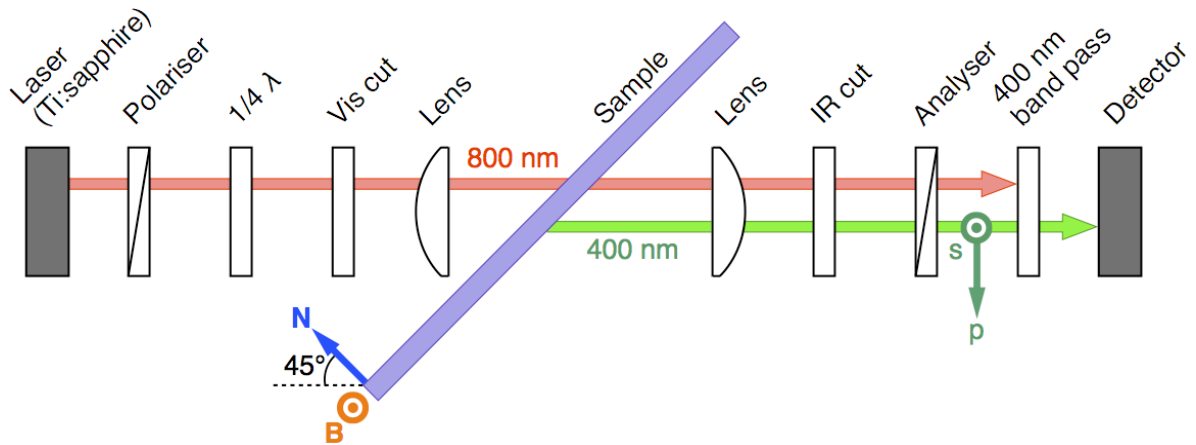

**Supplementary Fig. 19** | Optical scheme of the SHG circular dichroism measurement<sup>S3</sup>. As a fundamental beam, circularly polarized light (CPL, 800 nm wavelength) was incident at 45° to a film of poly-**F•G**<sub>1</sub>. In the case of a film with a magnetically oriented structure (~5 μm thick), the film was set so that the direction of the magnetic field that was applied during the LC film-formation process was perpendicular to the incident plane, *i.e.*, the helical axes of the columnar objects were parallel to the incident plane. Generated frequency-doubled light (400 nm wavelength) was detected from the transmitted direction by using an s- or p-analyzer. **B**: Magnetic field applied during the LC film-preparation process. **N**: Normal vector of the film surface.

**Supplementary Table 1 | Thicknesses of film samples.**

| Measurement            | Thickness          | Main text | Supplementary Information      |
|------------------------|--------------------|-----------|--------------------------------|
| POM                    | ~10 $\mu\text{m}$  | Figs 2, 3 | Supplementary Figs 1, 3, 4, 16 |
| XRD (polydomain film)  | ~20 $\mu\text{m}$  | Fig. 4    | Supplementary Figs 5, 17, 18   |
| XRD (monodomain clump) | ~200 $\mu\text{m}$ | —         | Supplementary Figs 8–10        |
| IR                     | ~10 $\mu\text{m}$  | Fig. 3    | Supplementary Fig. 15          |
| SHG                    | ~5 $\mu\text{m}$   | Fig. 6    | —                              |



**Supplementary Table 2 | Elemental analysis for films of poly-F with macroscopically oriented structures.**

| Sample<br>(preparation)                                                 | Composition                                                                  | Calculated |       |       | Found |      |      |
|-------------------------------------------------------------------------|------------------------------------------------------------------------------|------------|-------|-------|-------|------|------|
|                                                                         |                                                                              | C          | H     | N     | C     | H    | N    |
| poly-F•T<br>(polymerizing F•T)                                          | C <sub>58</sub> H <sub>91</sub> N O <sub>12</sub>                            | 70.06      | 9.22  | 1.41  | 69.68 | 9.23 | 1.30 |
| poly-F•vacant<br>(desorbing T from poly-F•T)                            | C <sub>49</sub> H <sub>78</sub> O <sub>12</sub> *                            | 69.80*     | 9.33* | 0.00* | 69.24 | 9.51 | 0.00 |
| poly-F•G <sub>1</sub><br>(adsorbing G <sub>1</sub> to poly-F•vacant)    | C <sub>56.04</sub> H <sub>87.68</sub> N <sub>2.64</sub> O <sub>12.76</sub> † | 67.13†     | 8.82† | 3.69† | 66.22 | 8.91 | 3.79 |
| poly-F•vacant<br>(desorbing G <sub>1</sub> from poly-F•G <sub>1</sub> ) | C <sub>49</sub> H <sub>78</sub> O <sub>12</sub> *                            | 69.80*     | 9.33* | 0.00* | 68.75 | 9.47 | 0.00 |

\* Calculated supposing quantitative desorption of T or G<sub>1</sub>.

† Calculated supposing 88% incorporation of G<sub>1</sub>.

## Supplementary Methods: Determination of the Space Group of poly-F•T

The data collected at BL26B2 in SPring-8 for a monodomain clump of poly-F•T were processed with the program CrystalClear (Rigaku)<sup>S4</sup>.

**Bravais lattice.** Within 6 Å resolution of the 18 frames, a total of 183 reflections with  $I > 20\sigma(I)$  were found (Supplementary Fig. 5b). The unit cell was determined to be primitive hexagonal or trigonal with  $a = 31.523(17)$  Å and  $c = 42.63(6)$  Å [ $V = 36684(4)$  Å<sup>3</sup>], where 163 reflections were indexed with this unit cell.

**Laue group.** The above unit cell dimension gave the following 7 candidates of the Laue group.

$$\bar{1}, 2/m, \bar{3}, \bar{3}m1, \bar{3}1m, 6/m, 6/mmm$$

(low <----- symmetry -----> high)

The internal residual factor ( $R_{\text{int}}$ ) was calculated for all candidates, by using the integrated intensity of the indexed 163 reflections<sup>S5</sup>. The most probable Laue group is that with the highest symmetry and with an acceptably small  $R_{\text{int}}$  value. As a reference, checkCIF (a service of the International Union of Crystallography) does not give an alert when the  $R_{\text{int}}$  value is less than 0.10<sup>S6</sup>. In the present case, the  $R_{\text{int}}$  value was 0.026 at  $6/mmm$  symmetry, which is the highest symmetry among the candidates. Accordingly, the Laue group was determined to be  $6/mmm$ .

**Space group.** The Laue group  $6/mmm$  gave the following 18 candidates of space group<sup>S7</sup>:

$$P622, P6_122, P6_222, P6_322, P6_422, P6_522, P6mm, P6cc, P6_3cm,$$

$$P6_3mc, \bar{P}6m2, \bar{P}6c2, \bar{P}6_2m, \bar{P}6_2c, P6/mmm, P6/mcc, P6_3/mcm, P6_3mmc$$

From these candidates, the most probable space group was deduced considering the systematic extinction rule for the  $00l$  reflections, as follows<sup>S7</sup>, where A and D denote appearance and disappearance of the reflection, respectively.

| Reflection condition | 00l Reflection |     |     |     |     |     | Space group                                                                                |
|----------------------|----------------|-----|-----|-----|-----|-----|--------------------------------------------------------------------------------------------|
|                      | 001            | 002 | 003 | 004 | 005 | 006 |                                                                                            |
| $l: \text{any}$      | A              | A   | A   | A   | A   | A   | $P622, P6mm, \bar{P}6m2, \bar{P}6_2m, P6/mmm$                                              |
| $l = 2n$             | D              | A   | D   | A   | D   | A   | $P6_322, P6cc, P6_3cm, P6_3mc, \bar{P}6c2,$<br>$\bar{P}6_2c, P6_3/mmc, P6_3/mcm, P6_3/mcc$ |
| $l = 3n$             | D              | D   | A   | D   | D   | A   | $P6_222, P6_422$                                                                           |
| $l = 6n$             | D              | D   | D   | D   | D   | A   | $P6_122, P6_522$                                                                           |

The 001, 002, 003, 004, 005 and 006 reflections are to be observed at 42.62, 21.32, 14.21, 10.66, 8.52 and 7.11 Å resolution, respectively. Considering that no Bragg spots were detected above 9 Å resolution in all collected frames (Supplementary Fig. 8b), the 004, 005 and 006 reflections were anticipated to be undetectable irrespective of space group; intensity of such high-order reflections are generally low. Meanwhile, the 001, 002 and 003 reflections are not likely to be missed so long as the reflection condition is met, because reflections with higher orders than these (*e.g.*, the 113 and 023 reflections) were detected. In all collected frames, the 001, 002 and 003 reflections were not observed (Supplementary Fig. 8b). Among the above candidates of space group, only  $P6_122$  and its enantiomorph  $P6_522$  can account for the disappearance of the 001, 002 and 003 reflections. Therefore, the space group was determined to be  $P6_122$  or  $P6_522$ .

## Supplementary References

- S1. PDXL version 2.2.1. Rigaku Corporation, Tokyo, Japan (2014).
- S2. Ishida, Y. *et al. J. Am. Chem. Soc.* **132**, 17435–17446 (2010).
- S3. Araoka, F. *et al. Phys. Rev. Lett.* **94**, 137801 (2005).
- S4. CrystalClear. Rigaku Americas, The Woodlands, Texas, USA and Rigaku Corporation, Tokyo, Japan (2009).
- S5. Giacovazzo, C. *Phasing in Crystallography: A Modern Perspective* (Oxford, 2014).
- S6. International Union of Crystallography. checkCIF.  
[http://journals.iucr.org/services/cif/checking/RINTA\\_01.html](http://journals.iucr.org/services/cif/checking/RINTA_01.html)
- S7. Looijenga-Vos, A. & Buerger, M. J. In *Space-Group Symmetry: Vol. A of International Tables for Crystallography* (ed. Hahn, T.), Part 3 (Springer, 2005).
